# Supplementary material for: Impact of iPSC-derived microglial exosomes on neurons: Role of TREM2 and implication in Alzheimer's Disease
Source: Research Square preprint supplement (doi:10.21203/rs.3.rs-7487794/v1), 2025-09-17
Supplement: Supplementary file 1 [file 0f57d326e0c4e53fdec0aad6.xlsx]

## Sheet: CV_vs_Control
	baseMean	log2FoldChange	lfcSE	stat	pvalue	padj			baseMean	log2FoldChange	lfcSE	stat	pvalue	padj
AC007193.10	5.4614	4.5273	1.49239	3.0336	0.00241658	0.999941		ENSG00000275895	164.745	-0.70454	0.226762	-3.10696	0.00189022	0.999941
ANKRD1	9.60953	3.01572	1.04601	2.88308	0.00393803	0.999941		RP11.347C12.2	174.877	-0.683765	0.211113	-3.23885	0.00120011	0.999941
ART5	23.5172	1.43063	0.514447	2.78092	0.00542058	0.999941		ZNF320	114.071	-0.622031	0.231157	-2.69094	0.00712508	0.999941
CD72	25.4256	1.39091	0.537067	2.58982	0.00960248	0.999941		FAM13A.AS1	119.952	-0.613871	0.223096	-2.7516	0.00593048	0.999941
KRT18	48.8649	1.35246	0.423598	3.1928	0.001409	0.999941
PLD1	68.3881	1.31768	0.329967	3.99337	6.5141634766322e-05	0.343948
LSR	54.5881	1.04125	0.369392	2.81882	0.00482001	0.999941
STC2	107.038	0.884891	0.284684	3.10833	0.00188149	0.999941
SLC17A6	113.732	0.826202	0.256734	3.21812	0.00129032	0.999941
COL12A1	185.91	0.790665	0.257817	3.06677	0.00216385	0.999941
SLC16A6	68.7477	0.790237	0.297916	2.65255	0.00798856	0.999941
COL1A1	482.26	0.779309	0.13747	5.66892	1.43697564162884e-08	0.000303489
MITF	76.7134	0.779284	0.29451	2.64603	0.00814419	0.999941
MMP2	291.044	0.660745	0.180071	3.66935	0.000243168	0.999941
TMCC3	197.787	0.64712	0.204653	3.16204	0.00156667	0.999941
TRH	154.676	0.641991	0.220149	2.91616	0.00354365	0.999941
SULF1	803.775	0.608613	0.140565	4.32976	1.49269546629765e-05	0.157629
CTGF	283.049	0.607261	0.219928	2.76119	0.00575919	0.999941
CALB1	144.55	0.598591	0.219032	2.73289	0.00627814	0.999941
TUBBP1	246.867	0.582384	0.220928	2.63608	0.00838703	0.999941
UNC5C	272.318	0.564645	0.187452	3.01221	0.00259351	0.999941
TRPM3	452.249	0.549028	0.136248	4.02963	5.58658621415454e-05	0.343948
AC022431.1	170.938	0.50425	0.194828	2.58819	0.0096483	0.999941

## Sheet: R47Hhet_vs_Control
	baseMean	log2FoldChange	lfcSE	stat	pvalue	padj			baseMean	log2FoldChange	lfcSE	stat	pvalue	padj
C1orf229	69.5736	0.51881	0.196849	2.63558	0.00839936	0.999778		RP11.493G17.4	4.19514	-2.73029	0.933997	-2.92323	0.00346423	0.999778
AC074138.3	82.8176	0.536685	0.190863	2.81189	0.00492509	0.999778		CTD.2555A7.3	5.60971	-2.55154	0.829896	-3.07453	0.00210836	0.999778
LSM12P1	259.748	0.55312	0.144657	3.82368	0.000131477	0.999778		ENSG00000284625	3.28542	-2.51672	0.971622	-2.59022	0.00959146	0.999778
OXSM	141.942	0.588971	0.171503	3.43417	0.000594382	0.999778		AC073043.1	3.39511	-2.38509	0.849487	-2.80769	0.00498989	0.999778
VDAC1P1	62.6978	0.677548	0.253346	2.6744	0.00748642	0.999778		RP11.403A21.3	2.93677	-2.3073	0.857709	-2.69007	0.00714378	0.999778
ENSG00000280173	57.5534	0.712634	0.236443	3.01398	0.00257847	0.999778		HOXB13	4.98916	-2.23169	0.730895	-3.05336	0.00226294	0.999778
KCNJ8	35.402	0.718185	0.271938	2.64099	0.00826642	0.999778		RP3.436N22.3	2.72692	-2.22381	0.844833	-2.63225	0.00848207	0.999778
PTGFR	59.7418	0.762938	0.230045	3.31647	0.000911635	0.999778		POU5F1P6	3.85611	-2.15615	0.800962	-2.69195	0.00710361	0.999778
CLEC18B	54.5773	0.831227	0.246688	3.36955	0.000752916	0.999778		RN7SKP29	3.56725	-1.93165	0.712068	-2.71273	0.00667309	0.999778
GPR132	28.287	0.840933	0.311661	2.69823	0.00697091	0.999778		RP4.655C5.1	6.50082	-1.75491	0.675487	-2.59799	0.00937705	0.999778
RP11.199A1.1	32.6846	0.847771	0.278814	3.04063	0.0023608	0.999778		AC003077.1	6.98542	-1.70599	0.583293	-2.92476	0.00344721	0.999778
FERMT3	24.781	0.888983	0.324305	2.74119	0.0061217	0.999778		C3orf65	10.8045	-1.61531	0.549247	-2.94095	0.00327208	0.999778
IQCH.AS1	39.9048	0.901229	0.304579	2.95894	0.00308703	0.999778		SETP18	7.90787	-1.32523	0.470495	-2.81668	0.00485235	0.999778
ZNF322P1	21.4538	1.0532	0.34115	3.08721	0.00202043	0.999778		NOXRED1	13.7047	-1.28294	0.477436	-2.68714	0.00720676	0.999778
RP11.326K13.4	20.0209	1.15282	0.420336	2.74262	0.00609515	0.999778		ENSG00000279900	11.9701	-1.27992	0.425841	-3.00564	0.00265023	0.999778
RP11.30L15.4	25.1104	1.31587	0.410164	3.20815	0.00133594	0.999778		ENSG00000280198	14.3273	-1.25446	0.40885	-3.06826	0.00215312	0.999778
AL137145.1	17.0528	1.31947	0.471372	2.79921	0.00512278	0.999778		IGFBP6	15.0699	-1.19356	0.406728	-2.93454	0.00334043	0.999778
RP11.545E17.3	14.423	1.33821	0.515419	2.59636	0.00942168	0.999778		ZNRF4	12.2733	-1.14074	0.410965	-2.77577	0.00550716	0.999778
ADCY10	28.4184	1.45554	0.43697	3.33098	0.000865403	0.999778		RP11.977G19.11	13.6567	-1.09925	0.399404	-2.75223	0.00591912	0.999778
RP5.1042I8.7	20.2497	1.57079	0.439782	3.57175	0.000354598	0.999778		RP11.715J22.4	14.4015	-1.03163	0.356232	-2.89596	0.00378005	0.999778
MGP	15.5877	1.69019	0.517948	3.26324	0.00110145	0.999778		AC002056.3	21.1761	-0.921213	0.303158	-3.03872	0.00237587	0.999778
RP11.49I11.1	9.99379	1.69653	0.621043	2.73175	0.00629989	0.999778		MTND6P21	31.5587	-0.735648	0.262762	-2.79967	0.00511549	0.999778
C11orf45	8.57874	1.77247	0.685818	2.58446	0.00975319	0.999778		UBAC2.AS1	44.9961	-0.73327	0.2698	-2.71783	0.00657111	0.999778
AQP3	16.5642	1.78844	0.488571	3.66056	0.000251667	0.999778		ENSG00000279853	51.543	-0.697495	0.23553	-2.96138	0.00306265	0.999778
IL4I1	10.1263	1.86305	0.609696	3.05571	0.00224532	0.999778		FAM3C2	182.23	-0.652009	0.171833	-3.79443	0.000147982	0.999778
CTC.325H20.7	6.72762	2.29552	0.784772	2.92508	0.00344373	0.999778		ENSG00000283538	67.0474	-0.65031	0.233176	-2.78893	0.00528832	0.999778
NPAS4	16.4682	2.30968	0.8263	2.79521	0.00518664	0.999778		MATN2	182.799	-0.639299	0.213863	-2.9893	0.00279619	0.999778
PIWIL3	4.2707	3.40619	1.31832	2.58373	0.00977388	0.999778		NPTX2	381.203	-0.572195	0.183522	-3.11785	0.00182173	0.999778
CTD.2616J11.2	4.73453	3.99062	1.41454	2.82115	0.00478517	0.999778		MAGED4B	136.305	-0.561328	0.183798	-3.05405	0.00225774	0.999778
DENND2D	4.73113	4.00013	1.36641	2.92748	0.00341721	0.999778		CTD.2619J13.17	44.0028	-0.553175	0.201745	-2.74195	0.00610763	0.999778
RP11.723O4.3	5.01693	4.08334	1.3592	3.00421	0.00266268	0.999778		C19orf71	87.8252	-0.544193	0.176508	-3.0831	0.00204853	0.999778
ENSG00000279481	2.78453	4.16514	1.42344	2.92612	0.0034322	0.999778		AP000525.10	86.826	-0.506768	0.190197	-2.66444	0.00771167	0.999778
RP11.674I16.2	2.7492	4.20844	1.4868	2.83053	0.00464717	0.999778
AC007193.10	5.37337	4.2284	1.3098	3.22828	0.00124539	0.999778
CTD.2555K7.3	2.77312	4.24234	1.4659	2.89402	0.00380338	0.999778
FAM153A	2.83853	4.2673	1.46194	2.91892	0.00351243	0.999778
SHE	4.16515	4.77222	1.32844	3.59235	0.000327711	0.999778

## Sheet: R47Hhom_vs_Control
	baseMean	log2FoldChange	lfcSE	stat	pvalue	padj			baseMean	log2FoldChange	lfcSE	stat	pvalue	padj
ENSG00000278817	247.994	2.20332	0.271627	8.11156	4.99723e-16	9.96848e-12		ESRP2	12.6715	-2.54761	0.987565	-2.57969	0.00988903	0.999813
SMIM11	167.161	1.34974	0.314977	4.2852	1.82575e-05	0.0910504		FUT7	14.9709	-2.49638	0.91804	-2.71926	0.0065429	0.999813
PLD1	65.2324	1.27918	0.415406	3.07935	0.00207456	0.999813		ADORA2A.AS1	44.8451	-1.63218	0.491302	-3.32215	0.000893254	0.848506
DIRAS3	112.44	1.24593	0.379551	3.28265	0.00102838	0.932458		RPL29P11	58.7098	-1.3297	0.50548	-2.63058	0.00852403	0.999813
STC2	104.984	1.02529	0.35727	2.86978	0.00410761	0.999813		RP11.98J23.2	101.335	-1.32469	0.466281	-2.84097	0.00449762	0.999813
SLC17A6	109.961	0.991275	0.373757	2.65219	0.00799705	0.999813		ENSG00000275895	156.15	-1.24414	0.303216	-4.10314	4.07578e-05	0.135506
HK2	441.655	0.875185	0.210045	4.16665	3.09102e-05	0.123319		GP1BA	92.1454	-1.04715	0.3729	-2.80811	0.00498325	0.999813
COL12A1	201.979	0.809757	0.263745	3.07022	0.002139	0.999813		RP11.1391J7.1	98.3219	-0.960764	0.336599	-2.85433	0.00431275	0.999813
CDH13	326.908	0.771413	0.264079	2.92114	0.00348748	0.999813		TFAP2E	99.0484	-0.904661	0.33721	-2.68278	0.00730122	0.999813
TTC30B	258.748	0.709374	0.258457	2.74465	0.00605752	0.999813		RHOF	120.686	-0.856372	0.312388	-2.74138	0.00611821	0.999813
AK4	515.053	0.672048	0.173939	3.8637	0.000111681	0.278477		CEBPB	287.431	-0.840532	0.21984	-3.82339	0.000131631	0.291754
DSEL	465.457	0.669144	0.182467	3.66721	0.000245214	0.407627		AC009299.5	241.667	-0.818549	0.31742	-2.57875	0.00991571	0.999813
P4HA1	1048.01	0.665993	0.15111	4.40733	1.04653e-05	0.0910504		RP11.159D12.2	360.403	-0.804179	0.231611	-3.4721	0.000516396	0.617229
CDH7	2131.85	0.653455	0.150924	4.3297	1.4931e-05	0.0910504		ENSG00000279145	179.059	-0.714417	0.267112	-2.6746	0.00748182	0.999813
NKAIN2	769.89	0.652214	0.22977	2.83855	0.00453187	0.999813		KCNQ1OT1	346.795	-0.691663	0.254651	-2.71612	0.00660511	0.999813
SORCS1	719.684	0.641484	0.217827	2.94493	0.00323029	0.999813		ENSG00000277476	230.217	-0.656177	0.240142	-2.73246	0.00628641	0.999813
PDK1	678.397	0.635875	0.19531	3.25573	0.00113103	0.980946		MYO15B	505.455	-0.648899	0.210802	-3.07824	0.00208224	0.999813
CLSTN2	969.572	0.611309	0.170047	3.59495	0.000324458	0.462306		ANKRD36B	449.579	-0.638081	0.215379	-2.96259	0.00305058	0.999813
PDZRN3	584.888	0.577672	0.200164	2.886	0.00390178	0.999813		MFSD2A	340.089	-0.605138	0.206349	-2.93259	0.00336147	0.999813
DDIT4	1493.68	0.562654	0.15444	3.6432	0.000269274	0.413191		UVSSA	2413.81	-0.60302	0.153569	-3.9267	8.61194e-05	0.245416
FLRT3	929.594	0.545444	0.174061	3.13364	0.00172653	0.999813		COL7A1	664.957	-0.588168	0.164492	-3.57565	0.000349354	0.464594
RGS7	1183.93	0.526429	0.152511	3.45175	0.000556954	0.617229		ENSG00000278922	364.269	-0.577199	0.216647	-2.66423	0.00771637	0.999813
CDH6	573.965	0.524822	0.177303	2.96003	0.00307612	0.999813		SSPO	1928.65	-0.568088	0.164191	-3.45993	0.000540314	0.617229
VSNL1	1989.59	0.518718	0.193281	2.68374	0.00728029	0.999813		TNXB	688.777	-0.541826	0.2005	-2.70238	0.00688454	0.999813
C8orf34	448.573	0.514332	0.19141	2.68706	0.00720837	0.999813
RBFOX1	2739.56	0.509763	0.158156	3.22316	0.00126786	0.999813
RFX2	483.827	0.506335	0.180675	2.80246	0.00507148	0.999813
CALN1	647.741	0.505928	0.1959	2.58258	0.00980639	0.999813
SYN2	1006.81	0.500068	0.169072	2.95772	0.0030992	0.999813

## Sheet: TREM2KO_vs_Control
	baseMean	log2FoldChange	lfcSE	stat	pvalue	padj			baseMean	log2FoldChange	lfcSE	stat	pvalue	padj
MGP	16.6383	2.43308	0.887211	2.74239	0.00609933	0.999479		CCDC19	23.1268	-2.12104	0.809853	-2.61905	0.00881763	0.999479
RGPD6	115.806	1.92338	0.417668	4.60506	4.12356e-06	0.0826527		XXbac.B562F10.11	30.2405	-1.59537	0.617372	-2.58414	0.00976232	0.999479
NOMO3	250.112	0.90131	0.259392	3.4747	0.00051142	0.999479		RP11.98J23.2	100.341	-1.41859	0.466165	-3.04311	0.00234145	0.999479
COL1A2	212.461	0.811369	0.247954	3.27226	0.00106691	0.999479		SYCP2	55.7363	-1.4181	0.45546	-3.11355	0.0018485	0.999479
CTGF	343.424	0.782421	0.25115	3.11536	0.00183723	0.999479		ENSG00000280213	41.5444	-1.40865	0.545785	-2.58096	0.00985259	0.999479
AC103965.1	379.985	0.771554	0.225365	3.42357	0.000618036	0.999479		ENSG00000279400	61.0005	-1.32705	0.476514	-2.78491	0.00535428	0.999479
LDHB	1103.76	0.537618	0.20129	2.67086	0.00756569	0.999479		ERVW.1	78.8799	-1.19639	0.454616	-2.63164	0.00849744	0.999479
								ANKRD36B	407.163	-0.991031	0.229131	-4.32518	1.52409e-05	0.10183
								AC131180.4	217.42	-0.818448	0.283641	-2.88551	0.00390785	0.999479
								ENSG00000279192	746.356	-0.813149	0.220349	-3.69028	0.000224004	0.748323
								FSIP2	629.978	-0.715574	0.184389	-3.88078	0.000104122	0.417405
								RP11.347C12.2	191.39	-0.677066	0.260233	-2.60176	0.00927458	0.999479
								KANK4	364.231	-0.674329	0.241111	-2.79676	0.0051618	0.999479
								TSHZ2	259.76	-0.66484	0.250881	-2.65002	0.00804867	0.999479
								ANKRD36C	758.942	-0.612592	0.19429	-3.15297	0.00161616	0.999479
								ANKRD36	799.482	-0.564504	0.197688	-2.85554	0.00429642	0.999479
								CUX2	1941.61	-0.537855	0.151882	-3.54127	0.000398201	0.997693

## Sheet: R47Hhet_vs_Cv
	baseMean	log2FoldChange	lfcSE	stat	pvalue	padj			baseMean	log2FoldChange	lfcSE	stat	pvalue	padj
TRPM5	2.45651	4.00703	1.11162	3.60468	0.00031254	0.78134		AC004019.10	2.54413	-2.67669	0.902894	-2.96457	0.00303107	0.831966
AC092651.1	3.5312	3.84744	1.15017	3.34512	0.000822476	0.78134		NNMT	3.47306	-2.54065	0.791654	-3.20929	0.00133064	0.821143
FAM186A	4.15112	3.755	1.12919	3.3254	0.000882909	0.789386		ALDH1A1	4.77979	-2.44313	0.679862	-3.59356	0.000326185	0.78134
OR7C1	2.2759	3.50788	1.1521	3.04477	0.00232861	0.831966		ENSG00000285593	2.93355	-2.43955	0.808341	-3.01797	0.00254473	0.831966
FAM224B	3.60789	3.2124	1.11279	2.8868	0.00389185	0.831966		GHRH	2.59019	-2.40404	0.77848	-3.08812	0.00201428	0.831966
MIR1972.1	2.52117	3.17458	1.21606	2.61054	0.00903993	0.885379		MEIS3P2	5.50841	-2.04146	0.713	-2.8632	0.00419386	0.831966
ENSG00000273000	2.47328	3.09883	1.08276	2.86196	0.00421029	0.831966		KRT31	16.1076	-1.97749	0.592282	-3.33876	0.000841543	0.78134
RP11.144F15.1	2.70929	3.0962	1.20064	2.5788	0.00991446	0.885379		RP11.1012A1.7	3.39968	-1.86824	0.630442	-2.96338	0.00304284	0.831966
RP13.580F15.2	4.83856	2.90799	0.843373	3.44805	0.00056465	0.78134		TTC6	3.06554	-1.82513	0.706386	-2.58376	0.00977307	0.885379
CTD.2562J15.4	5.01797	2.69078	0.794713	3.38585	0.000709584	0.78134		ENSG00000279235	2.8993	-1.79765	0.67062	-2.68058	0.00734956	0.885379
RP11.238F2.1	3.61515	2.63181	0.952915	2.76186	0.00574738	0.856523		LY86.AS1	3.46509	-1.78245	0.659609	-2.70228	0.00688655	0.885379
MIR4322	4.61846	2.52324	0.918691	2.74656	0.00602239	0.860239		ENSG00000274620	4.77813	-1.67796	0.60551	-2.77116	0.00558573	0.856523
C16orf89	3.88103	2.3922	0.911686	2.62393	0.00869204	0.885379		RP11.552E20.4	19.6219	-1.51509	0.463918	-3.26586	0.00109132	0.821143
RP11.164P12.3	4.76419	2.08042	0.685112	3.03662	0.00239249	0.831966		TMSB15A.1	28.6187	-1.49034	0.468726	-3.17956	0.001475	0.821143
PHBP4	5.29044	1.97777	0.726924	2.72074	0.00651351	0.876603		OSTN	189.887	-1.4332	0.530926	-2.69943	0.00694576	0.885379
RP11.845C23.2	12.9225	1.95156	0.573805	3.40109	0.000671178	0.78134		CTD.2302E22.3	4.35635	-1.42427	0.53066	-2.68396	0.00727556	0.885379
ENSG00000276032	12.9699	1.9053	0.609882	3.12405	0.00178377	0.831966		RP4.555D20.2	7.45956	-1.40947	0.537899	-2.62033	0.0087844	0.885379
PNMT	5.99906	1.69965	0.646335	2.62967	0.00854684	0.885379		GOLGA8UP	5.64111	-1.3946	0.492944	-2.82913	0.00466751	0.831966
ENSG00000279845	11.8648	1.60504	0.51301	3.12867	0.00175598	0.831966		PEBP4	8.56384	-1.35053	0.478036	-2.82516	0.00472574	0.831966
ENPP3	8.13729	1.58396	0.550626	2.87666	0.00401914	0.831966		AC003005.2	5.46936	-1.3408	0.518252	-2.58716	0.00967697	0.885379
RP5.968P14.2	8.61629	1.55919	0.54768	2.84689	0.0044148	0.831966		MYO1G	5.66862	-1.33897	0.519154	-2.57913	0.00990489	0.885379
RP11.250B2.3	7.64492	1.54394	0.561713	2.74862	0.00598461	0.860239		ANKRD20A18P	5.40741	-1.33607	0.490978	-2.72125	0.00650349	0.876603
ENSG00000277224	32.5998	1.4857	0.452369	3.28426	0.00102249	0.821143		ENSG00000272056	11.2196	-1.30695	0.405703	-3.22146	0.00127541	0.821143
ENSG00000276663	9.59094	1.43683	0.516858	2.77993	0.00543708	0.856523		BMP3	18.603	-1.30546	0.452912	-2.88236	0.00394705	0.831966
RP11.365O16.6	8.7373	1.40742	0.462012	3.04629	0.00231683	0.831966		AC018804.7	7.97369	-1.1531	0.427028	-2.7003	0.00692778	0.885379
AP000442.1	11.0707	1.30759	0.498083	2.62525	0.00865845	0.885379		CCM2L	10.5347	-1.13685	0.421867	-2.6948	0.00704305	0.885379
SMIM11	115.533	1.28772	0.396232	3.24992	0.00115438	0.821143		IGFBP6	16.3656	-0.983441	0.328242	-2.99609	0.00273469	0.831966
TEK	12.3121	1.24868	0.458015	2.72629	0.00640508	0.876603		RP11.395L14.5	24.7816	-0.976417	0.306594	-3.18472	0.00144893	0.821143
RP11.403A21.2	11.6694	1.19077	0.428942	2.77606	0.00550223	0.856523		CBS	416.828	-0.923618	0.32434	-2.84769	0.00440385	0.831966
ENSG00000285280	9.63776	1.17016	0.452148	2.58799	0.00965375	0.885379		PPP1R1C	14.3905	-0.916716	0.349756	-2.62102	0.00876681	0.885379
BDKRB2	25.6018	1.15756	0.391144	2.95942	0.00308219	0.831966		SAMD3	42.6761	-0.905923	0.346966	-2.61098	0.0090282	0.885379
RP11.80H5.7	17.8004	1.15143	0.444212	2.59207	0.00954004	0.885379		CILP	14.6219	-0.85832	0.307167	-2.79431	0.00520101	0.853397
ADRA1B	17.9434	1.11951	0.415163	2.69655	0.00700617	0.885379		ENSG00000272145	27.5444	-0.824199	0.250932	-3.28455	0.00102144	0.821143
HMCN2	27.8507	1.06776	0.315994	3.37904	0.000727397	0.78134		GPR139	33.0121	-0.819308	0.30205	-2.71249	0.00667795	0.885379
TNRC18P1	12.8901	1.05835	0.361286	2.9294	0.00339616	0.831966		TMEM72	27.3309	-0.802004	0.291434	-2.75192	0.0059247	0.860239
C10orf54	15.4456	1.03988	0.388359	2.67761	0.00741493	0.885379		ENSG00000280152	17.3244	-0.794716	0.291332	-2.72787	0.00637445	0.876603
SCARNA13	16.321	0.997219	0.381526	2.61376	0.00895509	0.885379		RP11.932O9.10	20.2342	-0.743517	0.264076	-2.81554	0.00486953	0.831966
TBC1D3B	26.3773	0.988072	0.337907	2.9241	0.00345458	0.831966		HRASLS	21.8175	-0.732347	0.27384	-2.67435	0.00748733	0.885379
ADCY10	28.038	0.985727	0.349305	2.82196	0.00477304	0.831966		RP11.556K13.1	37.548	-0.667839	0.235987	-2.82998	0.00465503	0.831966
RP11.932O9.7	21.0876	0.937545	0.323675	2.89656	0.00377273	0.831966		RP11.389G6.3	91.7504	-0.635357	0.200871	-3.163	0.0015615	0.821143
ENSG00000272973	17.7194	0.90871	0.344251	2.63967	0.00829856	0.885379		SATB2.AS1	431.077	-0.626074	0.166677	-3.75622	0.000172501	0.594883
GLIS1	48.1706	0.900841	0.284429	3.1672	0.00153917	0.821143		FAM83H	217.393	-0.596228	0.177696	-3.35533	0.000792711	0.78134
MRO	25.1036	0.880241	0.319411	2.75582	0.00585445	0.856523		TG	117.176	-0.594837	0.208353	-2.85495	0.0043043	0.831966
GPR132	28.4574	0.877282	0.317255	2.76523	0.00568834	0.856523		KAZALD1	66.8196	-0.59122	0.184606	-3.2026	0.00136191	0.821143
CHADL	17.0378	0.859196	0.32208	2.66765	0.00763843	0.885379		TUBBP1	213.221	-0.577315	0.164868	-3.50168	0.000462332	0.78134
SEPHS1P1	18.8701	0.857138	0.32588	2.63022	0.00853287	0.885379		TMCC3	176.855	-0.566049	0.169153	-3.34638	0.000818737	0.78134
FAM157C	113.576	0.846799	0.280466	3.01925	0.00253397	0.831966		UNC5C	252.073	-0.557424	0.192523	-2.89537	0.00378716	0.831966
RP11.96K19.4	47.0689	0.830887	0.247422	3.35817	0.000784596	0.78134		CYB561	352.943	-0.551988	0.178237	-3.09693	0.00195536	0.831966
AC005534.6	19.0174	0.812207	0.313815	2.58817	0.00964873	0.885379		RP11.162A12.2	43.7859	-0.541507	0.188761	-2.86874	0.00412104	0.831966
PEAR1	20.0873	0.80219	0.277099	2.89495	0.00379215	0.831966		CPXM2	146.269	-0.53716	0.205375	-2.61551	0.00890938	0.885379
ENSG00000285748	51.9326	0.801966	0.253413	3.16466	0.00155263	0.821143		ENSG00000275993	288.032	-0.527362	0.154765	-3.40751	0.000655591	0.78134
TFP1	38.4094	0.782069	0.275133	2.84252	0.0044759	0.831966
RP11.685M7.3	24.3575	0.764905	0.284628	2.68739	0.00720133	0.885379
CTB.151G24.1	65.9191	0.726258	0.24694	2.94103	0.00327123	0.831966
USH1G	20.2672	0.725838	0.271726	2.67122	0.00755767	0.885379
NME2	52.6107	0.699492	0.22882	3.05695	0.00223602	0.831966
RP11.279F6.1	39.5134	0.695768	0.242928	2.8641	0.004182	0.831966
C1QL2	85.541	0.618747	0.212765	2.90813	0.00363601	0.831966
RP11.16N11.2	36.3054	0.60188	0.229943	2.61752	0.00885705	0.885379
RP11.499E18.1	60.474	0.598939	0.228494	2.62125	0.00876079	0.885379
ILK	117.862	0.588712	0.190973	3.0827	0.00205134	0.831966
AC004057.1	1349.57	0.570797	0.12817	4.45342	8.45133e-06	0.102008
AC005562.1	52.7226	0.558585	0.195181	2.86189	0.00421128	0.831966
ENSG00000279196	65.9801	0.555287	0.199847	2.77857	0.00545996	0.856523
HLF	274.573	0.545473	0.197773	2.75808	0.00581416	0.856523
ENSG00000282022	52.9874	0.529871	0.189217	2.80034	0.00510491	0.84988
C8orf4	612.998	0.519385	0.167548	3.09992	0.00193571	0.831966

## Sheet: TREM2KO_vs_Cv
	baseMean	log2FoldChange	lfcSE	stat	pvalue	padj			baseMean	log2FoldChange	lfcSE	stat	pvalue	padj
ENSG00000276032	9.73647	2.72788	0.958567	2.84579	0.0044301	NA		AP006216.12	5.22409	-3.61575	1.39028	-2.60073	0.00930264	NA
ENSG00000277224	30.6402	1.67342	0.554978	3.01529	0.00256731	NA		RP11.46A10.4	5.72685	-3.5372	1.35653	-2.60753	0.00911968	NA
HSPA6	73.0161	1.3307	0.401467	3.3146	0.000917737	NA		MTHFD1P1	7.86657	-3.19829	1.14598	-2.79088	0.00525646	NA
PTGDS	50.2103	1.24342	0.357775	3.47542	0.000510057	NA		DMRTC1	9.67096	-3.06547	1.17349	-2.61226	0.00899452	NA
NME2	51.4032	1.04191	0.395704	2.63305	0.00846223	NA		RP11.739N20.2	11.568	-2.03029	0.744768	-2.72607	0.0064094	NA
ENSG00000279196	64.1876	0.840735	0.30024	2.80021	0.00510696	NA		CCDC19	33.4414	-1.91455	0.50916	-3.76021	0.000169769	NA
NGFR	322.283	0.810972	0.198255	4.09055	4.30348e-05	NA		STRIP2	16.8288	-1.81885	0.671164	-2.71	0.00672839	NA
ENSG00000278012	124.64	0.802842	0.268537	2.98968	0.00279266	NA		BMP3	24.6481	-1.63464	0.625765	-2.61222	0.00899559	NA
DHRS2	117.217	0.800064	0.262073	3.05283	0.00226695	NA		ENSG00000280011	32.0443	-1.55692	0.468113	-3.32594	0.000881217	NA
PPM1J	82.5355	0.739837	0.280703	2.63566	0.00839739	NA		RP11.158M2.4	24.6322	-1.41013	0.54555	-2.5848	0.00974367	NA
TNFSF9	113.13	0.729048	0.269819	2.70199	0.00689265	NA		XXbac.B562F10.11	28.0838	-1.30592	0.472112	-2.76613	0.00567257	NA
AC103965.1	365.85	0.699073	0.177293	3.94303	8.04574e-05	NA		RHCG	67.8089	-1.22033	0.341807	-3.57023	0.000356671	NA
LDHB	997.935	0.686169	0.148723	4.61373	3.95503e-06	0.0221925		CES5A	39.6298	-1.1945	0.447663	-2.6683	0.00762368	NA
BLOC1S1	274.462	0.682512	0.234861	2.90603	0.00366049	NA		ENSG00000280213	38.3987	-1.11785	0.411529	-2.71634	0.00660076	NA
RP11.572P18.1	683.127	0.671595	0.160325	4.18895	2.80248e-05	0.024453		SYCP2	51.3345	-1.11725	0.357805	-3.1225	0.00179319	NA
ZP3	112.139	0.64938	0.23116	2.80922	0.00496621	NA		RP11.701H24.7	135.866	-0.995443	0.284405	-3.50009	0.000465096	NA
CTA.29F11.1	237.139	0.62509	0.203559	3.07081	0.00213481	NA		ENSG00000285669	43.2687	-0.992702	0.385369	-2.57598	0.00999567	NA
KB.1460A1.5	218.608	0.621764	0.180709	3.44069	0.000580235	NA		CCDC144CP	53.3948	-0.986437	0.356267	-2.76881	0.00562611	NA
TINCR	165.351	0.619633	0.234184	2.64592	0.00814695	NA		LSR	53.9921	-0.974166	0.361982	-2.6912	0.00711959	NA
COX8A	1885.8	0.61112	0.145374	4.20377	2.62511e-05	0.024453		IRS4	87.181	-0.87334	0.291726	-2.9937	0.00275619	NA
TMEM256	288.783	0.596323	0.210253	2.83621	0.00456519	NA		FAM86HP	57.9318	-0.871976	0.315944	-2.7599	0.00578189	NA
SNHG8	397.595	0.578459	0.179894	3.21556	0.00130191	NA		RP4.798A10.2	77.3826	-0.824686	0.279478	-2.95081	0.00316944	NA
CA5B	187.908	0.569992	0.182001	3.1318	0.00173738	NA		SH3GL1P1	76.1033	-0.823664	0.300261	-2.74316	0.00608514	NA
HLF	269.4	0.564859	0.205228	2.75234	0.00591705	NA		ZNF69	160.951	-0.802694	0.214494	-3.74227	0.000182369	NA
COX6A1	1681.61	0.564075	0.152541	3.69784	0.000217439	0.0552755		NEUROG1	177.67	-0.802607	0.253809	-3.16224	0.00156558	NA
PPP1R32	268.081	0.545289	0.182718	2.98433	0.00284204	NA		GRIN3A	227.962	-0.793033	0.232176	-3.41565	0.000636291	NA
AC004057.1	1205.39	0.53977	0.132444	4.07546	4.59239e-05	0.0268927		LHX5	181.125	-0.764341	0.253325	-3.01724	0.00255091	NA
DDIT3	405.011	0.52028	0.175964	2.95675	0.00310904	NA		AC093415.2	87.7222	-0.737823	0.255949	-2.88269	0.00394292	NA
UQCR11	536.874	0.50368	0.161994	3.10926	0.00187558	NA		RP11.210M15.2	90.4731	-0.734638	0.278179	-2.64088	0.00826909	NA
PLA2G3	460.74	0.501945	0.144127	3.48267	0.000496437	NA		AC007383.3	88.054	-0.731762	0.27886	-2.62412	0.00868722	NA
								ZNF804A	189.43	-0.727736	0.257101	-2.83054	0.00464689	NA
								RP11.1277A3.2	173.141	-0.710336	0.229568	-3.09424	0.00197321	NA
								HMCN1	109.27	-0.691057	0.255915	-2.70034	0.00692688	NA
								FSIP2	650.18	-0.681753	0.145958	-4.67089	2.99904e-06	NA
								RP11.431N15.2	132.726	-0.655306	0.23296	-2.81296	0.00490878	NA
								KIAA1024	225.582	-0.63575	0.209814	-3.03007	0.002445	NA
								PDZD2	433.558	-0.635745	0.202255	-3.14328	0.00167065	NA
								ZFHX2	745.524	-0.609912	0.140596	-4.33806	1.43748e-05	0.0221925
								ANKRD10.IT1	155.334	-0.60871	0.215909	-2.81929	0.00481307	NA
								UNC5C	268.833	-0.59394	0.192029	-3.09296	0.00198168	NA
								AC131180.4	208.881	-0.593117	0.216968	-2.73367	0.00626332	NA
								DLX6.AS1	434.839	-0.57874	0.195684	-2.95753	0.00310119	NA
								KIAA1614	155.963	-0.578542	0.212885	-2.71763	0.00657512	NA
								XRCC2	278.186	-0.574782	0.174358	-3.29656	0.000978769	NA
								ANKRD36B	350.463	-0.571909	0.200458	-2.85302	0.00433061	NA
								NBEAL1	532.306	-0.560088	0.155566	-3.60032	0.000317825	NA
								SAMD5	211.472	-0.556047	0.208802	-2.66304	0.0077438	NA
								FIGN	808.377	-0.55455	0.140052	-3.95959	7.50786e-05	0.0333849
								TENM2	440.146	-0.546197	0.186148	-2.93421	0.00334395	NA
								ZFHX3	1009.11	-0.536071	0.119561	-4.48367	7.33707e-06	0.0221925
								ANKRD36C	753.856	-0.533783	0.157643	-3.38604	0.0007091	0.0992182
								ITGA2	688.23	-0.530917	0.151617	-3.5017	0.000462292	0.0866023
								ZFHX4	2882.47	-0.528863	0.122529	-4.31622	1.58726e-05	0.0221925
								CRYBG3	191.106	-0.524423	0.202971	-2.58373	0.00977379	NA
								SOX5	10181.5	-0.524266	0.128979	-4.06474	4.80856e-05	0.0268927
								RP11.701H24.3	307.683	-0.524196	0.182595	-2.87082	0.00409412	NA
								C2CD2	155.528	-0.521841	0.202256	-2.5801	0.00987721	NA
								KLF8	348.725	-0.516416	0.155091	-3.32976	0.000869203	NA
								RNF180	457.312	-0.511907	0.142165	-3.60079	0.000317251	NA
								TENM4	6552.53	-0.505583	0.12774	-3.9579	7.56124e-05	0.0333849
