# Supplementary material for: Impact of iPSC-derived microglial exosomes on neurons: Role of TREM2 and implication in Alzheimer's Disease
Source: Research Square preprint supplement (doi:10.21203/rs.3.rs-7487794/v1), 2025-09-17
Supplement: Supplementary file 2 [file 6423f35bef0d44e3e28f6b24.docx]

Supplementary Table 1: List of primary and secondary antibodies

| **Target** | **Host** | **Supplier** | **Cat.No** | **Dilution** |
| --- | --- | --- | --- | --- |
| β-actin | Mouse | Sigma-Aldrich | A5441 | 1:5000 |
| β-III tubulin (TUJ1) | Mouse | Biolegend | 801202 | 1:1000 |
| β-III tubulin (TUJ1) | Rabbit | Biolegend | 8022001 | 1:5000 |
| ALIX (3A9) | Mouse | Cell Signalling | 2171 | 1:1000 |
| BRN2 (B-2) | Mouse | Santa Cruz | Sc-393324 | 1:500 |
| Cleaved Caspase-3 | Rabbit | Cell Signalling | 9664 | 1:500 |
| HSP70 | Mouse | abcam | ab2787 | 1:1000 |
| IBA-1 | Rabbit | Wako | 019-19741 | 1:500 |
| PSD95 | Rabbit | Abcam | ab18258 | 1:250 |
| SATB1+2 | Mouse | Abcam | ab51502 | 1:200 |
| Synaptophysin | Rabbit | Abcam | ab32127 | 1:500 |
| TBR1 | Rabbit | Abcam | ab31940 | 1:500 |
| anti-Mouse Alexa Fluor 488 | Goat | Invitrogen | A-11001 | 1:500 |
| anti-Mouse Alexa Fluor 568 | Goat | Invitrogen | A-11004 | 1:500 |
| anti-Rabbit Alexa Fluor 488 | Goat | Invitrogen | A-11008 | 1:500 |
| anti-Rabbit Alexa Fluor 568 | Goat | Invitrogen | A-11011 | 1:500 |

| **Target** | **Taqman Probe** | **Supplier** |
| --- | --- | --- |
| *SULF1* | Hs00392834_m1 | ThermoFisher Scientific |
| *MMP2* | Hs01548727_m1 | ThermoFisher Scientific |
| *IL33* | Hs04931857_m1 | ThermoFisher Scientific |
| *SSPO* | Hs00871643_m1 | ThermoFisher Scientific |
| *NPTX2* | Hs00383983_m1 | ThermoFisher Scientific |
| *GAPDH* | Hs99999905_m1 | ThermoFisher Scientific |

Supplementary Table 2: List of taqman probes
